# Supplementary material
Source: Springer Nature journal article supplement (https://www.springermedizin.de/resource/supplementary/13063_2014_2095_MOESM8_ESM.pdf/9621324)

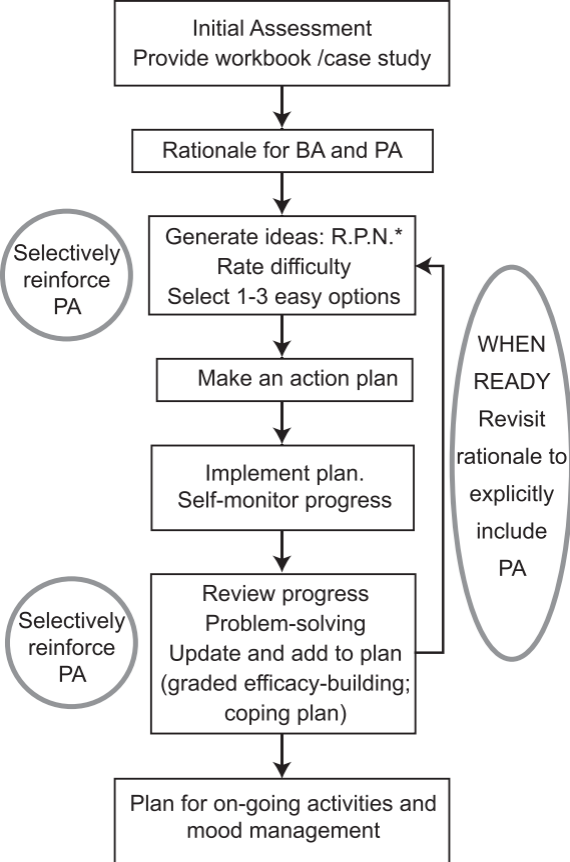

Supplement: MOESM8 [file 9621324]
